# Supplementary material for: Template-free solvothermal synthesis of hollow hematite spheres and their applications in gas sensors and Li-ion batteries
Source: Royal Society of Chemistry journal article supplement (doi:10.1039/c0jm03516e), 2011-01-01
Supplement: c0jm03516e.pdf [file c0jm03516e.pdf]

## **Hollow Hematite Spheres and their Applications in Gas Sensors and Li-ion Batteries**

Hyo-Joong Kim,<sup>a</sup> Kwon-Il Choi,<sup>a</sup> Anqiang Pan,<sup>bc</sup> Il-Doo Kim,<sup>d</sup> Hae-Ryong Kim,<sup>a</sup> Kang-Min Kim,<sup>a</sup> Chan Woong Na,<sup>a</sup> Guozhong Cao,<sup>\*b</sup>, and Jong-Heun Lee<sup>\*a</sup>

<sup>a</sup>Department of Materials Science and Engineering, Korea University, Seoul 136-713, Republic of Korea

<sup>b</sup>Department of Materials Science and Engineering, University of Washington, Seattle, Washington 98195, USA

<sup>c</sup>Department of Materials Science and Engineering, Central South University, Hunan, 410083, China

<sup>d</sup>Optoelectronic Materials Center, Korea Institute of Science and Technology, Seoul 130-650, Republic of Korea

\*To whom correspondence should be addressed.

Phone: +82-3290-3282, Fax: +82-2-928-3584, email: [jongheun@korea.ac.kr](mailto:jongheun@korea.ac.kr)

Phone: +1-206-616-9084, Fax: +1-206-543-2101, email: [gzcao@u.washington.edu](mailto:gzcao@u.washington.edu)

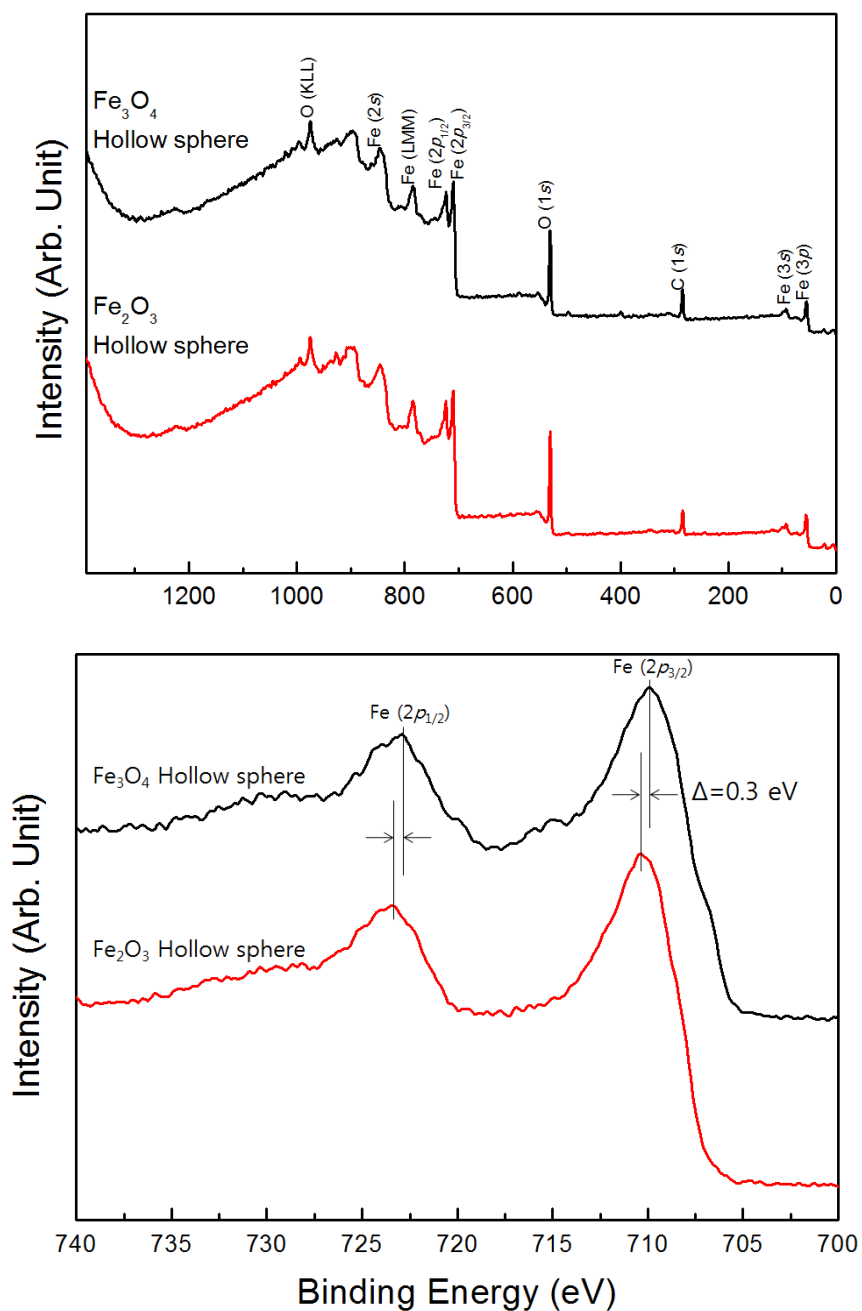

Fig. S1 X-ray photoelectron spectroscopy results of as-prepared Fe<sub>3</sub>O<sub>4</sub> hollow spheres and Fe<sub>2</sub>O<sub>3</sub> hollow spheres after heat treatment at 500°C for 2 h. The binding energies for Fe 2p<sub>1/2</sub> and Fe 2p<sub>3/2</sub> peaks of as-prepared Fe<sub>3</sub>O<sub>4</sub> hollow spheres were  $\sim 0.3$  eV lower than those of heat-treated Fe<sub>2</sub>O<sub>3</sub> hollow spheres. This indicates that the as-prepared specimens contain Fe<sup>2+</sup> and can be identified as Fe<sub>3</sub>O<sub>4</sub> rather than  $\gamma$ -Fe<sub>2</sub>O<sub>3</sub>.

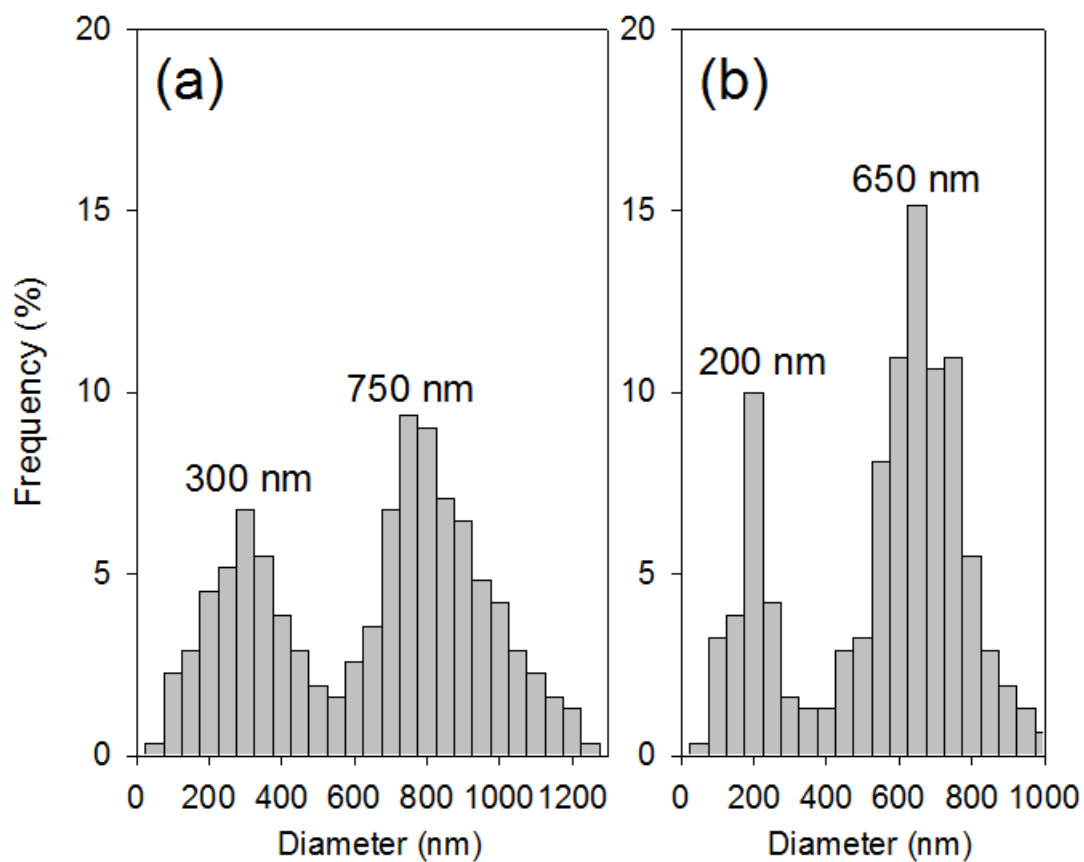

Fig. S2 Particle size distribution of (a) as-prepared Fe<sub>3</sub>O<sub>4</sub> hollow spheres and (b) Fe<sub>2</sub>O<sub>3</sub> hollow spheres after heat treatment at 500°C for 2 h. The diameters of 310 particles were measured for each specimen to get the particle size distribution. The two sizes in each graph are the mode diameters of bimodal particle size distribution.

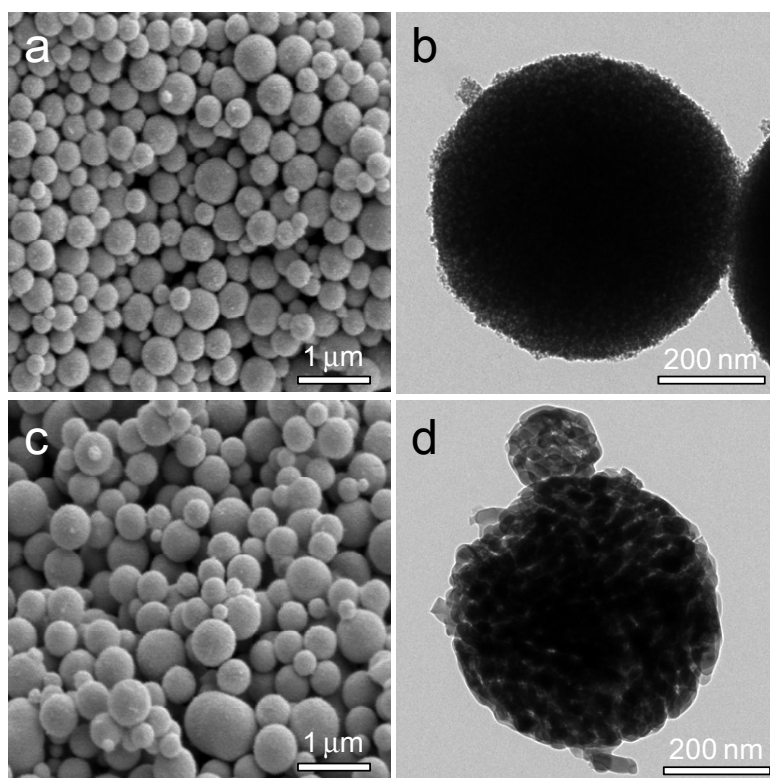

Fig. S3 SEM and TEM images of (a), (b) as-prepared  $\text{Fe}_3\text{O}_4$  and (c), (d)  $\text{Fe}_2\text{O}_3$  solid spheres after heat treatment at  $500^\circ\text{C}$  for 2 h. The spheres with solid inner structures were prepared by the solvothermal reaction of  $\text{C}_2\text{H}_5\text{OH}$  solution containing only  $\text{Fe}(\text{CH}_3\text{CHOO})_2$ .

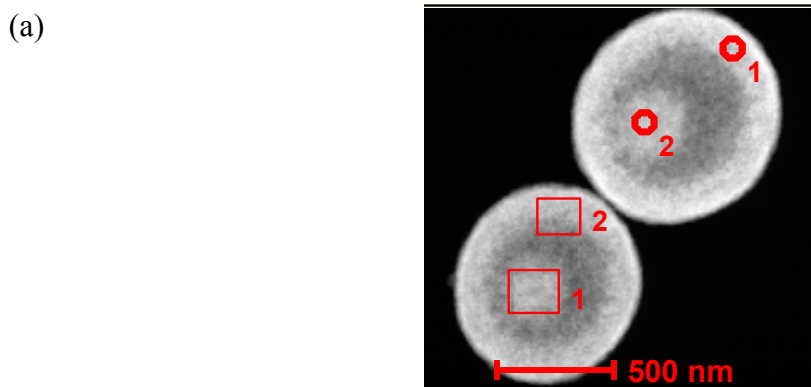

|    | Outer Point (O1) | Inner point (O2) | Outer area (2) | Inner area (1) |
|----|------------------|------------------|----------------|----------------|
| C  | 58.15            | 71.32            | 52.91          | 63.53          |
| N  | 5.77             | 8.65             | 8.24           | 9.63           |
| O  | 22.59            | 13.74            | 24.38          | 18.64          |
| Fe | 11.73            | 6.27             | 14.44          | 8.18           |

(atomic %)

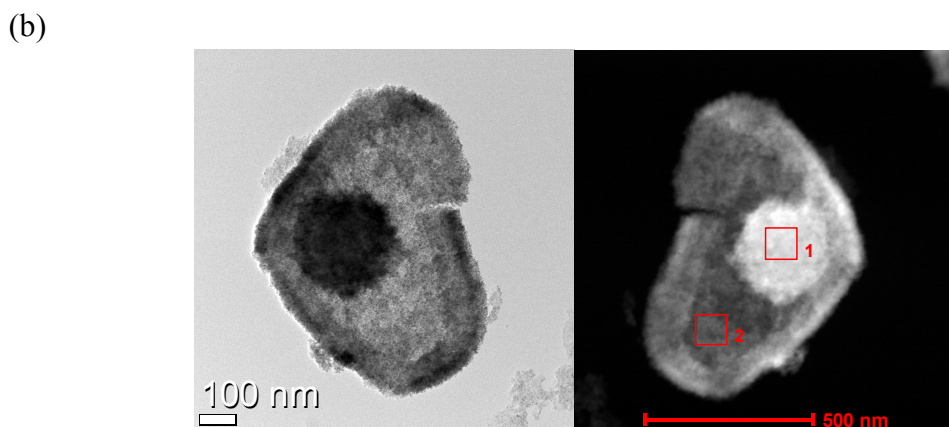

|    | Area 1 | Area 2 |
|----|--------|--------|
| C  | 78.71  | 71.03  |
| N  | 6.13   | 2.52   |
| O  | 9.31   | 13.63  |
| Fe | 5.85   | 12.82  |

(atomic %)

Fig. S4 EDS analysis results of as-prepared hollow spheres: (a) hollow spheres and (b) broken hollow spheres.

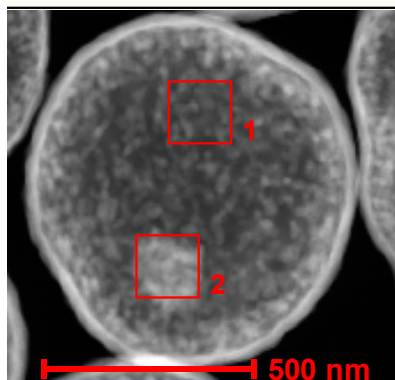

|    | Area 1 | Area 2 |
|----|--------|--------|
| C  | 22.77  | 11.76  |
| O  | 48.92  | 56.67  |
| Fe | 28.30  | 31.55  |

(atomic %)

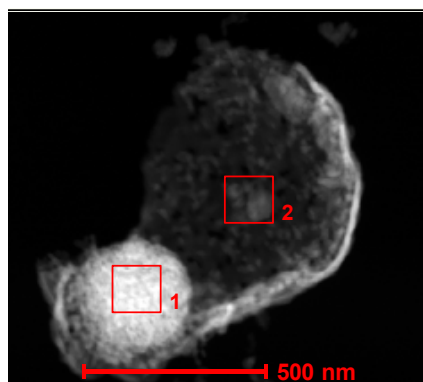

|    | Area 1 | Area 2 |
|----|--------|--------|
| C  | 21.92  | 61.56  |
| O  | 44.03  | 25.42  |
| Fe | 34.05  | 13.02  |

(atomic %)

Fig. S5 EDS analysis results of  $\text{Fe}_2\text{O}_3$  hollow spheres after heat treatment at  $500^\circ\text{C}$  for 2 h: (a) hollow spheres and (b) broken hollow spheres.

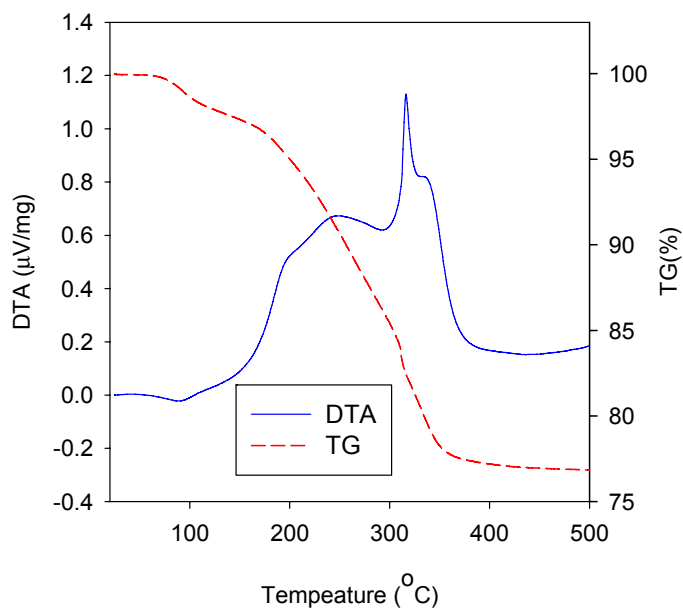

Fig. S6 DTA and TG curves of as-prepared  $\text{Fe}_3\text{O}_4$  hollow spheres.

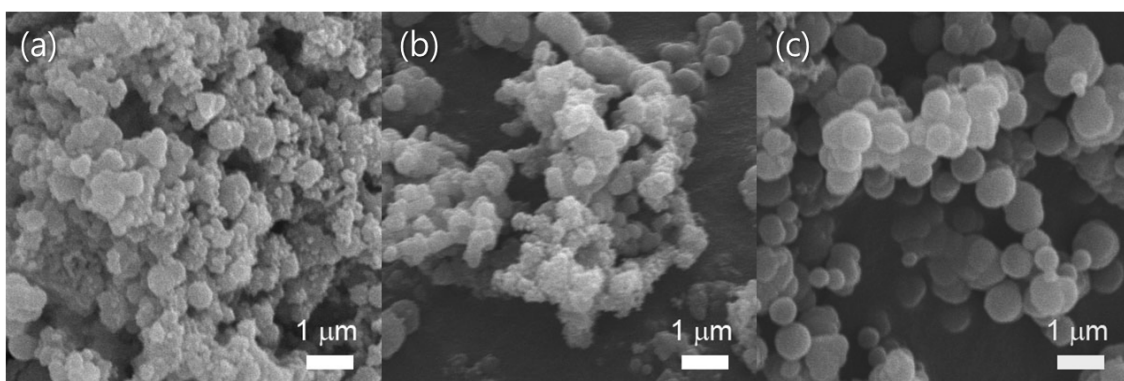

Fig. S7 Morphologies of the products after solvothermal reaction of ethanol solution containing iron (II) acetate and L(+)-Lysine at 200 °C (a) for 0.5 h, (b) 1 h and (c) 2 h.

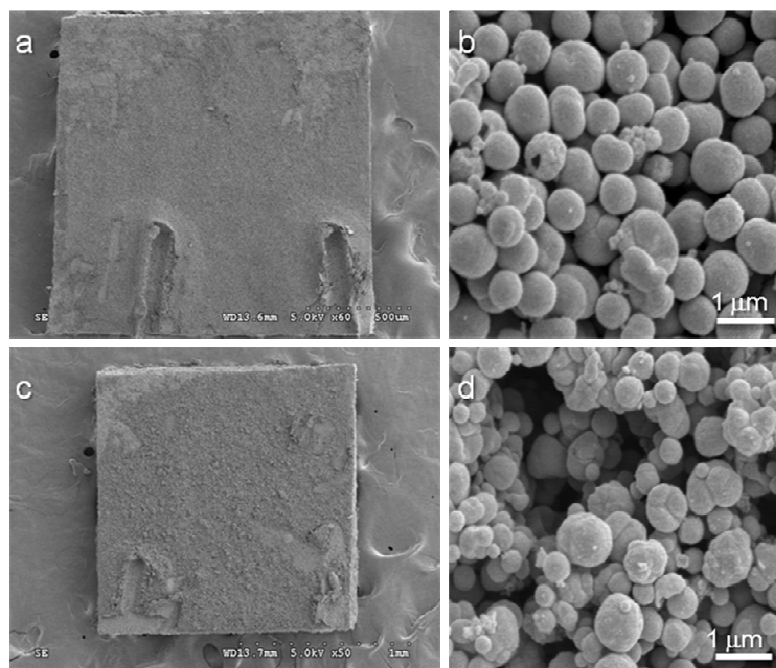

Fig. S8 The low and high magnification images of sensor surfaces: (a,b)  $\text{Fe}_2\text{O}_3$  hollow spheres sensor; and (c,d) Pt-doped  $\text{Fe}_2\text{O}_3$  hollow spheres sensor.



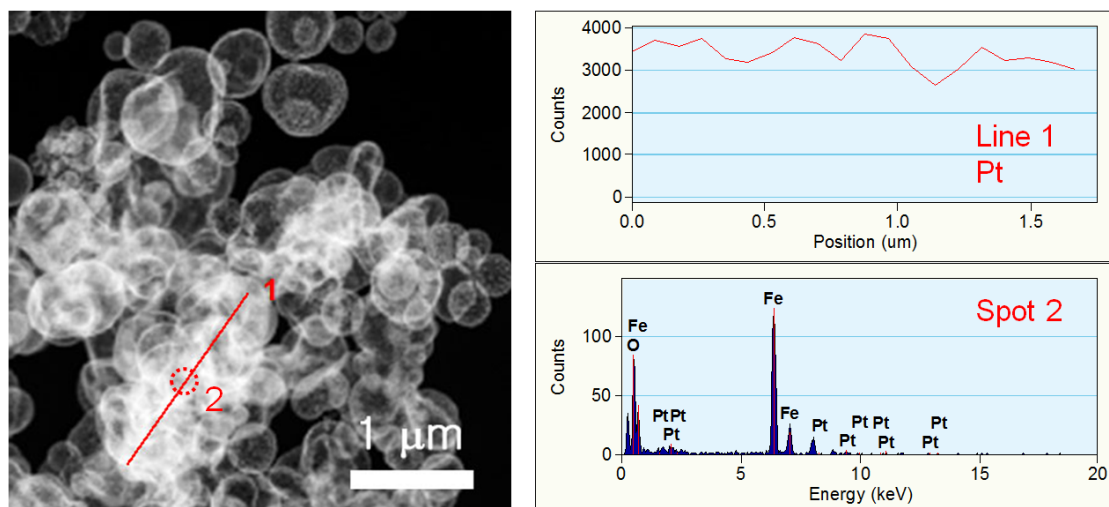

| Spot 1 |       |
|--------|-------|
| O (K)  | 53.34 |
| Fe (K) | 45.45 |
| Pt (L) | 1.21  |

(atomic %)

Fig. S9 EDS analysis results of Pt-doped Fe<sub>2</sub>O<sub>3</sub> hollow spheres after heat treatment at 500°C for 2 h.

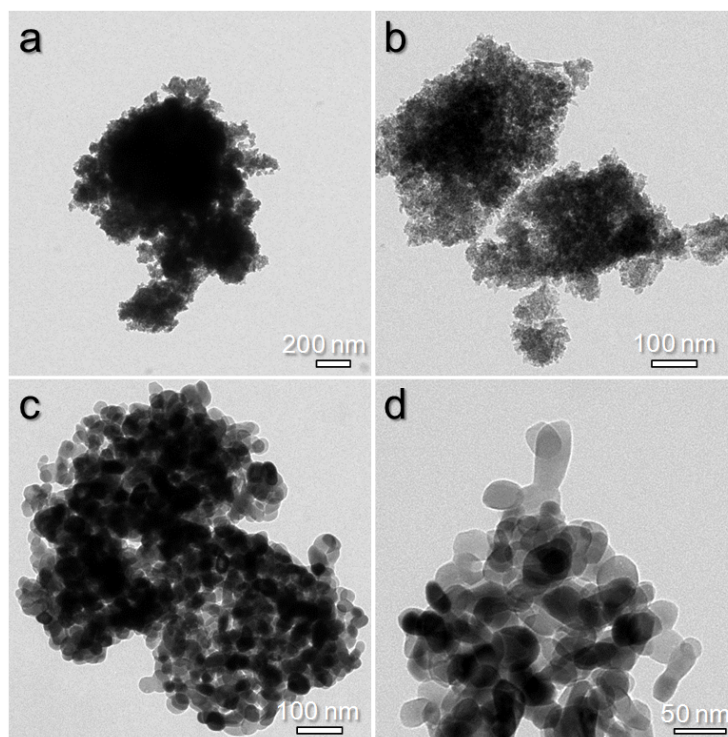

Fig. S10 TEM images of (a,b) Fe-precursors prepared by carbonate precipitation and (c,d)  $\text{Fe}_2\text{O}_3$  agglomerated nanoparticles after heat treatment at  $500^\circ\text{C}$  for 2 h.

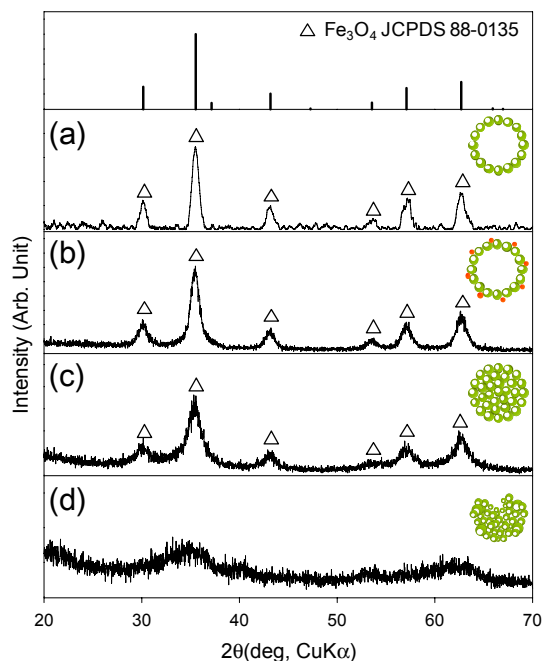

Fig. S11 X-ray diffraction patterns of (a) as-prepared  $\text{Fe}_3\text{O}_4$  hollow spheres, (b) as-prepared Pt-doped  $\text{Fe}_3\text{O}_4$  hollow spheres, (c) as-prepared  $\text{Fe}_3\text{O}_4$  solid spheres, and (d) as-prepared Fe-carbonate precursors.

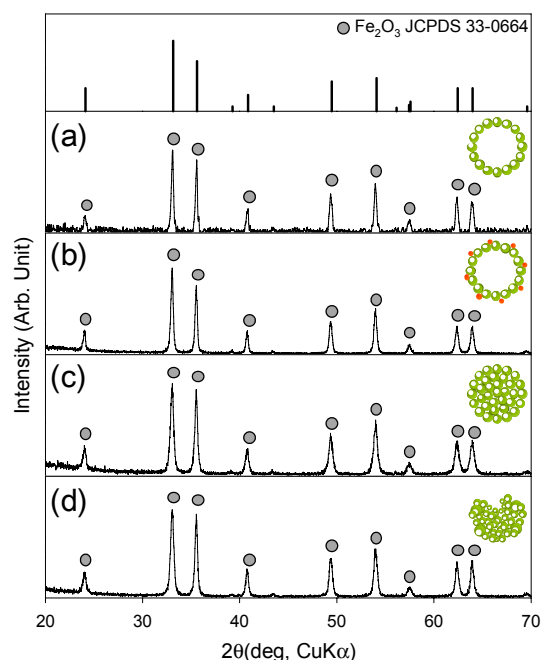

Fig. S12 X-ray diffraction patterns of (a)  $\text{Fe}_2\text{O}_3$  hollow spheres, (b) Pt-doped  $\text{Fe}_2\text{O}_3$  hollow spheres, (c)  $\text{Fe}_2\text{O}_3$  solid spheres, and (d)  $\text{Fe}_2\text{O}_3$  agglomerated nanoparticles after heat treatment at  $500^\circ\text{C}$  for 2 h.

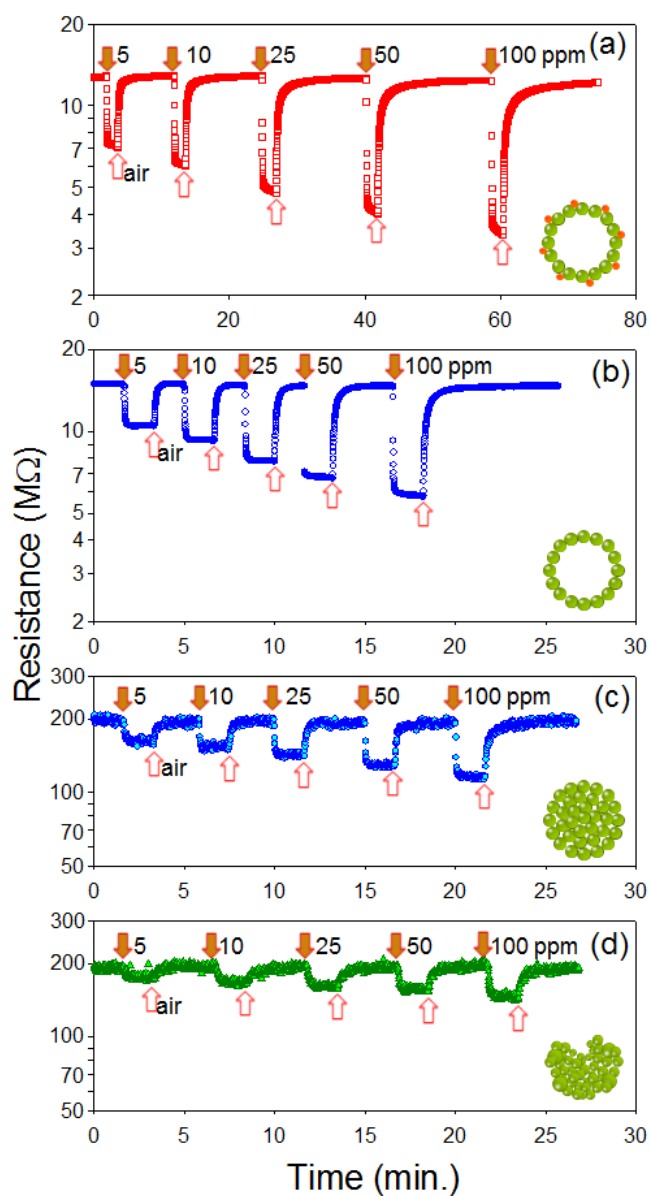

Fig. S13 Ethanol sensing transients of (a) Pt-doped  $Fe_2O_3$  hollow spheres, (b)  $Fe_2O_3$  hollow spheres, (c)  $Fe_2O_3$  solid spheres, and (d)  $Fe_2O_3$  agglomerated nanoparticles at the sensing temperature of  $400^\circ C$ .
